materials and supplies within the anesthesia environment; understands Occupational Safety and Health Administration guidelines for anesthesia and patient safety in the perioperative environment; conducts quality control procedures after repair or service to equipment; assists in the preparation of the capital budget for the anesthesia department; provides training and orientation to staff as needed; maintains medications within their expiration date and properly disposes of unused or remnants in appropriate containers; is knowledgeable of the College of American Pathologists and the Centers for Medicare & Medicaid Services Clinical

Laboratory Improvement Amendments regulations for ancillary laboratories; understands and follows the American Association of Blood Banks (AABB) recommendation and policies regarding banked blood products and cell salvaged blood, and in accordance with employer and professional policies; recognizes and adheres to conduct and ethics rules.

The anesthesia technologist/technician is an incredible asset to our anesthesia care team currently – yet, as the ASATT continues to standardize their education and practice, their contribution can and will be so much more.

## Present Your Medically Challenging Cases at ANESTHESIOLOGY® 2018

Submission Deadline: **May 31, 2018** (11:59 p.m. CT)

The Medically Challenging Cases sessions provide attendees and residents the opportunity to present interesting and challenging cases that they have managed in their own practice. This section has continued to be a resounding success, and each year the number of presentations has grown, with more than 1,600 poster sessions presented at the 2017 meeting. Discussion is very lively at the poster presentations, and each year the committee has strived to provide the most interactive and educational experience possible. In 2017, the moderated discussions were

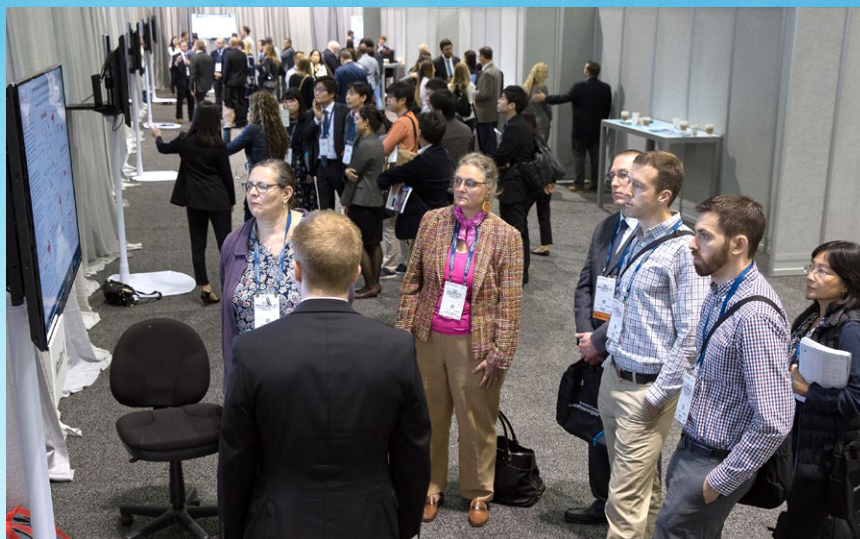

enhanced to provide increased time for interaction among the moderators, presenters and attendees, which promoted more in depth discussion, feedback and a comprehensive educational experience. Medically Challenging Cases were presented using an electronic format where each session was moderated by an expert physician faculty member. Each session was overseen by a member of the Committee on Scientific and Education Exhibits.

Participate in ANESTHESIOLOGY® 2018 in San Francisco by submitting your interesting case for presentation. Medically Challenging Case submissions are open to the public and must be submitted online through [goanesthesiology.org/submissions](http://goanesthesiology.org/submissions). ASA members may submit their cases for free. The submission site opened in February and runs through May 31, 2018.
